# Supplementary material for: An Myh11 single lysine deletion causes aortic dissection by reducing aortic structural integrity and contractility
Source: PubMed Central journal article supplement (PMC9133116; doi:10.1038/s41598-022-12418-8), 2022-05-25
Supplement: 41598_2022_12418_MOESM2_ESM.pdf [file 41598_2022_12418_MOESM2_ESM.pdf]

1 **Supplementary data**

2 **An Myh11 single lysine deletion causes aortic dissection by reducing**  
3 **aortic structural integrity and contractility**

4  
5 Keita Negishi<sup>1,2†</sup>; Kenichi Aizawa<sup>1†</sup>, Takayuki Shindo<sup>3</sup>, Toru Suzuki<sup>4</sup>,  
6 Takayuki Sakurai<sup>3</sup>, Yuichiro Saito<sup>5</sup>, Takuya Miyakawa<sup>6</sup>, Masaru Tanokura<sup>6</sup>,  
7 Yosky Kataoka<sup>7,8</sup>, Mitsuyo Maeda<sup>7,8</sup>, Shota Tomida<sup>1</sup>, Hiroyuki Morita<sup>9</sup>,  
8 Norifumi Takeda<sup>9</sup>, Issei Komuro<sup>9</sup>, Kazuomi Kario<sup>2</sup>,  
9 Ryozo Nagai<sup>10\*</sup>, and Yasushi Imai<sup>1\*</sup>

10  
11 <sup>1</sup> *Division of Clinical Pharmacology, Department of Pharmacology and* <sup>2</sup> *Division of*  
12 *Cardiovascular Medicine, Department of Medicine, Jichi Medical University, Tochigi,*  
13 *Japan*

14 <sup>3</sup> *Department of Cardiovascular Research, Shinshu University Graduate School of*  
15 *Medicine, Nagano, Japan*

16 <sup>4</sup> *Department of Cardiovascular Sciences University of Leicester Cardiovascular Research*  
17 *Centre, Glenfield Hospital, Leicester, UK*

18 <sup>5</sup> *System Integration Center, Gunma University Hospital, Gunma, Japan*

19 <sup>6</sup> *Department of Applied Biological Chemistry, Graduate School of Agricultural and Life*  
20 *Sciences, The University of Tokyo, Tokyo, Japan*

21 <sup>7</sup> *RIKEN Center for Biosystems Dynamics Research, Kobe, Japan*

22 <sup>8</sup> *RIKEN-JEOL Collaboration Center, Kobe, Japan*

23 <sup>9</sup> *Department of Cardiovascular Medicine, Graduate School of Medicine, The University of*  
24 *Tokyo, Tokyo, Japan*

25 <sup>10</sup> *Jichi Medical University, Tochigi, Japan*

26  
27 †These authors contributed equally to this work

28 \*To whom correspondence should be addressed

29 **Supplementary Methods**

30

31 ***Histological and immunohistochemical studies.*** After perfusion with phosphate-buffered  
32 saline (PBS, pH 7.4), the aorta and bladder were excised from anaesthetised mice. The  
33 uterus was also excised from females at the oestrous cycle stage identified by using stained  
34 vaginal smears. These tissues were fixed in 4% paraformaldehyde/0.1 mol/L phosphate  
35 buffer (PB, pH 7.4) at 4 °C for 24 h. The fixed tissues were dehydrated through an ethanol  
36 series, cleared with xylene, embedded in paraffin and sectioned into 5-µm-thick slices with  
37 a rotary microtome (MICROM HM360, ZEISS). The tissue sections were deparaffinised  
38 with xylene and rehydrated through an ethanol series and stained with haematoxylin and  
39 eosin (HE) to evaluate general morphology. Elastica van Gieson (EVG) and Masson  
40 trichrome (MT) staining were performed to specifically highlight elastic lamellas and  
41 collagen fibres. All staining reagents were purchased from Muto Pure Chemicals Co., Ltd.,  
42 and staining was performed according to the manufacturer's protocol. The sections were  
43 examined with a BX63 Upright Microscope system (Olympus) at ×40, ×200 and ×400  
44 magnifications. The circumference, the cross-sectional areas of the media and adventitia  
45 and the thickness of the myometrium were measured with ImageJ/Fiji software,<sup>1</sup> and their  
46 average thicknesses were calculated by dividing the area by the aortic circumference.

47 For the immunohistochemistry analysis of smooth muscle myosin heavy chain  
48 isoforms (SM1 and SM2), the aortas were harvested and fixed in 95% ethanol with 1%  
49 acetate acid for 24 h at 4 °C. Paraffin-embedded sections were prepared as described above.  
50 Endogenous peroxidase activity was blocked with 3% H<sub>2</sub>O<sub>2</sub>/methanol for 10 min at RT,

51 followed by incubation with 2.5% normal goat serum (S-1012, Vector Laboratories) for 20  
52 min at RT. The sections were incubated with a primary antibody against SM1 (dilution  
53 1:500; BM20, Kyowa Medix) for 60 min at RT, followed by incubation with peroxidase  
54 micropolymers (MP-7404, Vector Laboratories). SM2 antibody (7601, Yamasa  
55 Corporation) was labelled with horseradish peroxidase by using an HRP Conjugation Kit  
56 (ab102890, Abcam) in advance. Sections were incubated with the primary antibody labelled  
57 with HRP for 2 h at RT. DAB (SK-4105, Vector Laboratories) was used for detection, and  
58 slides were counterstained with haematoxylin.

59

60 ***Acquisition of large-scale electron microscopic images.*** Mice were perfused transcardially  
61 with fixative solution containing 2.5% glutaraldehyde and 4% sucrose in 0.1 mol/L PB.  
62 Thoracic aortas were removed, immersed in fixative solution for 2 h at 4 °C and then post-  
63 fixed with 1% osmium tetroxide in 0.1 mol/L PB for 90 min at 4 °C. Fixed tissues were  
64 dehydrated in graded ethanol and embedded in epoxy resin. The entire transverse ultrathin  
65 sections of the thoracic aorta of 70-nm thickness were cut, mounted on pieces of silicon  
66 wafers and contrasted with uranyl acetate and lead citrate. Large-scale electron microscopic  
67 images including entire transverse sections of the thoracic aortas were acquired using a  
68 backscattered electron detector with a scanning electron microscope (JSM-7800F, JEOL).  
69 Digital images (magnification  $\times 2,000$ ) of hundreds of compartmentalised rectangular areas  
70 covering each entire tissue section were obtained in a sequential order by moving a  
71 motorised stage of the specimens with merging areas of 15% of the next image, followed  
72 by the stitching procedure of all images into a single tiling image. The Grid/Collection

73 stitching plug-in in ImageJ/Fiji<sup>1</sup> was used to construct large-scale tiling images.<sup>2</sup> Large-  
74 scale electron microscopic images were observed using the JavaScript-based RIKEN CLST  
75 Electron Microscopic Viewer.<sup>3</sup>

76

77 ***Morphometric analysis of large-scale electron microscopy.*** Longitudinally sectioned  
78 SMCs (> 30  $\mu\text{m}$  of cellular diameter and > 5  $\mu\text{m}$  of nuclear diameter) were randomly  
79 selected from whole aortic ring sections obtained by large-scale electron microscopic  
80 images. The length ( $\mu\text{m}$ ) of the adhesive surfaces between the selected cell and other  
81 adjacent cells was measured by using a dedicated ImageJ/Fiji.<sup>1</sup> The sum of each adhesive  
82 length was considered to indicate the strength of cell adhesion of a single SMC  
83 (Supplemental Fig. S4A).

84 The whole aortic ring image was parted into 50–60 sections at lengths of 50  $\mu\text{m}$ .  
85 These 50- $\mu\text{m}$  aortic sections were randomly selected, and elastic lamellae identified as  
86 regions of plain texture were marked in black by Photoshop CC (Adobe, Supplemental Fig.  
87 S4B) because ImageJ/Fiji<sup>1</sup> could not distinguish elastic fibres and other components of the  
88 ECM, such as collagens and proteoglycans, by the differences in the image texture. The  
89 number of pixels was measured in the elastic region, and aortic sections were selected by  
90 using ImageJ/Fiji<sup>1</sup> and were used to calculate the area ratio of the elastic lamellae.

91

92 ***Analysis of smooth muscle function.*** Approximately 10 mm of aortic rings were removed  
93 from anaesthetised mice at 12 weeks of age and attached with the stainless-steel clips of the  
94 apparatus for isometric force measurement (RMT-1000; Nihon Kohden). The aortic rings

95 were mounted in an organ bath (20 mL) filled with Krebs–Henseleit buffer (K3753, Sigma-  
96 Aldrich), which was maintained at 37 °C and aerated with 95% O<sub>2</sub>/5% CO<sub>2</sub> throughout the  
97 experiment. All ring strips were subjected to a 10-mN preload and incubated for 60 min.  
98 The aortic rings were contracted in the presence of 10<sup>-5</sup> mol/L phenylephrine (Phe) for  
99 three contraction and relaxation cycles. The contractions to the subsequent Phe (10<sup>-10</sup>–10<sup>-5</sup>  
100 mol/L; 163-11791, Wako Pure Chemical Corporation) were determined sequentially and  
101 corrected with tissue weight (mg). The rate of relaxation was also obtained with subsequent  
102 acetylcholine (10<sup>-10</sup>–10<sup>-5</sup> mol/L; A6625, Sigma-Aldrich) and sodium nitroprusside (SNP 10<sup>-</sup>  
103 <sup>10</sup>–10<sup>-5</sup> mol/L; 1614501, Sigma-Aldrich) after the peak of the contractile response to Phe  
104 (10<sup>-6</sup> mol/L). The measured isometric force was analysed with LabChart version 8.1.9 (BIO  
105 Research Center Co., Ltd.).

106

107 ***Aortic dissection model.*** At the age of eight weeks, wild-type (WT) and heterozygous  
108 (*MYH11*<sup>ΔK/+</sup>) mice were implanted with osmotic pumps (model Alzet 1002; DURECT  
109 Corporation) filled with a solution of angiotensin II (Ang II; Peptide Institute, Inc.) in  
110 saline, according to a previously published method with some modification.<sup>4</sup> The  
111 concentration of Ang II was adjusted so that it was infused at a rate of 1,000 ng/kg/min.  
112 Before the implantation of osmotic pumps, the mice were administered anaesthetic. The  
113 absence of pedal reflex was used as an indicator of deep anaesthesia. Pumps were placed  
114 into the subcutaneous space at the back of the neck. After implantation, the mice were  
115 allowed to rest on a heating pad until recovering and becoming alert. The mice were  
116 observed for two weeks to monitor their survival and incidence rates. Mice surviving for

117 two weeks were sacrificed by intraperitoneal injection of 100 mg/kg pentobarbital, and  
118 their aortas were excised. The aortas were photographed at 6.3× magnification with a  
119 camera (MC170 HD, Leica Microsystems) mounted on a stereo-microscope (M60, Leica  
120 Microsystems). The mice were adapted to the blood pressure system (MK-2000ST,  
121 Muromachi Kikai Co., Ltd.) at least three times before implantation and after two weeks of  
122 treatment with Ang II.

123

124 ***RNA extraction and real-time quantitative PCR (RT-qPCR).*** Total RNA from the thoracic  
125 aorta was extracted with RNeasy Tissue Fibrous Kit (74704, Qiagen) according to the  
126 manufacturer's protocol. cDNA was synthesised from total RNA using ReverTra Ace with  
127 gDNA Remover (FSQ-301, TOYOBO), and endogenous genomic DNA was degraded by  
128 DNase I (Qiagen). qPCR was performed with a two-step cycling protocol (95 °C for 30 s  
129 followed by 40 cycles of 95 °C for 5 s and 60 °C for 30 s) or a three-step cycling protocol  
130 (95 °C for 1 min followed by 45 cycles of 95 °C for 15 s, 56 °C for 20 s and 72 °C for 45 s)  
131 by using SYBR Green PCR Master mix (Applied Biosystems) and LightCycler 480 (Roche  
132 Diagnostics). The primers for RT-PCR are listed in Supplemental Table S3. Experiments  
133 were performed in triplicate, and all data were normalised against the expression of *Gapdh*.

134

135 ***Immunoblot analysis.*** The excised aorta and bladder were trimmed of surrounding tissues  
136 and homogenised by using Bioprep-24 (Hangzhou Allsheng Instruments Co., Ltd.) in  
137 protein extraction solution (T-PER buffer [#78510, Thermo Fisher Scientific], protease  
138 inhibitor cocktail [1 tablet/10 mL; Roche Diagnostics] and phosphatase inhibitor cocktail [1

139 tablet/10 mL; Roche Diagnostics]). After homogenisation, the tissue lysates were  
140 centrifuged at 10,000 rpm for 10 min at 4 °C. The supernatants were collected and stored at  
141 -20 °C. Total protein concentrations were measured with the bicinchoninic acid Protein  
142 Assay Kit (Pierce Biotechnology). Protein (5 µg) for each sample was separated on a 10%  
143 Bis-Tris gel or 3–8% Tris-Acetate gel (Thermo Fisher Scientific) by SDS-PAGE and  
144 electroblotted to nitrocellulose membranes using iBlot2 Dry Blotting System (Thermo  
145 Fisher Scientific). The membranes were blocked with 5% skim milk in Tris-buffered saline  
146 with Tween (TBS-T; Cell Signaling Technology) for 1 h, washed and incubated overnight at  
147 4 °C in TBS-T with primary antibodies. Target molecules were detected with the  
148 appropriate HRP-conjugated secondary antibody (Cell Signaling Technology) and  
149 chemiluminescence kit (#170-5060, Bio-Rad Laboratories). Signals were detected by using  
150 LAS-3000 (FUJIFILM), and quantitative analysis was performed using ImageGauge  
151 Version 4.23 (FUJIFILM). Primary antibodies include anti- $\alpha$ -smooth muscle actin, anti-  
152 calponin, anti-E-cadherin, anti-FAK (Cell Signaling Technology), anti-SM-MHC (Santa  
153 Cruz Biotechnology), anti-elastin (Bioss Antibodies) and anti-GAPDH (Ambion).  
154 Antibodies against E-cadherin and FAK were diluted with the signal enhancer (DRC-  
155 W00H250, DRC Co., Ltd.).

156

157 **RNA-seq analysis.** Thoracic aortas were dissected from WT, *Myh11*<sup>ΔK/+</sup> and *Myh11*<sup>ΔK/ΔK</sup>  
158 mice. Total RNA was extracted using the RNeasy Tissue Fibrous Kit (74704, Qiagen) and  
159 the RNeasy MinElute Cleanup Kit (28004, Qiagen) according to the manufacturer's  
160 instructions. The RNA concentration and purity were measured with a Nanodrop instrument

161 (ND-1000, Thermo Fisher Scientific). The length of the RNA fragments was determined  
162 with an Agilent 2100 Bioanalyzer (Agilent, USA). The cDNA library was then prepared  
163 from 0.3µg of total RNA with oligo dT primer by reverse transcription followed by PCR  
164 amplification (TruSeq Standard mRNA Sample Prep Kit, Illumina) according to the  
165 manufacturer's protocol. The quality of the cDNA from aortas was assessed with a  
166 bioanalyzer (DNA 1000 Assay, Agilent), and the concentrations of the cDNA samples were  
167 determined by qPCR. Equal amounts of nine samples were pooled to prepare a 9-plex  
168 RNA-seq library. Single-end 50-base-pair reads were obtained from the 9-plex RNA-seq  
169 library. Using one lane of a flow cell of a HiSeq2500 instrument, the resulting sequence  
170 reads were then separated according to the index sequence. After the separation, the reads  
171 were trimmed and filtered using the MOIRAI workflow and mapped on the mm10 mouse  
172 genome assembly using STAR.<sup>5</sup>

173

174 ***Protein-protein interaction analysis.*** The genes downregulated in the *Myh11*<sup>ΔK/ΔK</sup> aorta  
175 according to RNA sequencing analysis were first filtered for involvement in the integrin or  
176 cadherin pathway by GO enrichment analysis<sup>6</sup> and AmiGo.<sup>7</sup> The genes identified as  
177 associated with the integrin or cadherin pathway were then inputted into the STRING  
178 database for incorporation into a protein-protein interaction diagram.<sup>8,9,10,11,12,13,14,15,16</sup>

179

180 ***Cell culture and retroviral infection.*** Retroviral vectors were prepared by transfecting  
181 pMXs-Oct4, Sox2, Klf4, c-Myc or Nanog into platinum-E packaging cells, as previously  
182 described.<sup>17</sup> Primary mouse embryonic fibroblasts were infected with the retroviral vectors.



183 The pMXs vectors were obtained from Addgene (<https://www.addgene.org/>). The iPSCs  
184 were routinely co-cultured with MEF or SNL feeder cells treated with mitomycin C  
185 (Fujifilm) on gelatine-coated dishes in Dulbecco's modified Eagle's medium (DMEM)/F12  
186 (Thermo Fisher Scientific) in the presence of 20% foetal bovine serum (FBS; Hyclone or  
187 Biocera), 0.1mmol/L 2-mercaptoethanol, GlutaMAX (Thermo Fisher Scientific),  
188 nonessential amino acids, penicillin/streptomycin and 1000U mouse LIF (Fujifilm). Trypsin  
189 or collagenase was used to detach iPSCs before being reseeded for passage.

190

191 ***Embryoid body formation.*** The iPSCs were suspended in the embryonic fibroblast medium  
192 (EFM) consisting of Dulbecco's modified Eagle medium with 4300 mg/L glucose  
193 (Fujifilm), 10% foetal bovine serum (Hyclone), 1 mmol/L or 0.1 mmol/L  
194 2-mercaptoethanol, GlutaMAX (TFS) and penicillin/streptomycin (Thermo Fisher  
195 Scientific). The cell suspension was pipetted on the inner side of the lid of a culture dish.  
196 Then, the lid was placed back on the culture dish to allow the cells to be incubated for 48  
197 hours.

198

199 ***Statistical analysis.*** Data are expressed as the mean  $\pm$  SEM unless otherwise indicated. 'n'  
200 represents the number of mice. A p-value  $< 0.05$  was considered significant (\*), and a p-  
201 value  $< 0.01$  was considered highly significant (\*\*). Statistical analysis and a graph  
202 drawing were performed with GraphPad Prism version 6.0.3 (GraphPad, Inc.).  
203 Comparisons of body weight between multiple groups were performed using one-way  
204 ANOVA with a Tukey post-hoc test. For RT-qPCR, immunoblotting, functional analysis

205 and morphometric analysis, comparisons between two different groups were calculated  
206 using a Mann-Whitney U test because of the small sample size. A chi-squared test was  
207 performed to compare the incidence of dissecting aneurysms in the Ang II infusion models.

208 **Supplementary Tables**

209 **Supplementary Table 1.** Occurrence of dissection in each aortic region. The ascending,  
 210 descending and abdominal aorta of each mouse was examined for the presence of  
 211 dissection (Fisher's exact test,  $p = 1.00$ ).

| Aortic region | Aortas examined | Aortas with dissection |
|---------------|-----------------|------------------------|
| Ascending     | 7               | 3                      |
| Descending    | 7               | 4                      |
| Abdominal     | 7               | 3                      |

212

213 **Supplementary Table 2.** Sequences corresponding to PAM recognised by both gRNA1  
 214 and 2

| ID                          | Sequences (5' -> 3')                                                                                                                                                                                                                                          | Location         | GeneBank #         |
|-----------------------------|---------------------------------------------------------------------------------------------------------------------------------------------------------------------------------------------------------------------------------------------------------------|------------------|--------------------|
| gRNA1                       | GTTCCACCTCCTGCTTCGCCTGG                                                                                                                                                                                                                                       | Myh11<br>exon 28 | NM_001161<br>775.1 |
| gRNA2                       | GAAGCTGGAGGTGCAGCTGCAGG                                                                                                                                                                                                                                       | Myh11<br>exon 28 | NM_001161<br>775.1 |
| Myh11<br>( $\Delta 1256K$ ) | GGATCCGATTAGCAAGCAGACACTGG<br>AGAAGGAGAACGCGGACCTGGCTGG<br>GGAGCTGCGTGTCTCTGGGCCAGGCG<br>AAGCAGGAGGTGGAACACAAGAAG<br>AAGCTGGAGGTGCAGCTGCAAGATC<br>TGCAGTCCAAGTGCAGTGATGGGGA<br>GCGTGCCCGGGCTGAGCTCAGTGAC<br>AAGGTCCACAAGCTACAGGTGAGGG<br>CAGGCAGCACAATCCATATG | Myh11<br>exon 28 | NM_001161<br>775.1 |

215

216 **Supplementary Table 3.** PCR primers for genotyping *Myh11* K1256del mice

| ID         | Sequence (5' -> 3')        | Product size |
|------------|----------------------------|--------------|
| Myh11ch-1S | GTTCTATGCACCCCTCCTCCCTTCC  | 525bp        |
| Myh11ch-1A | TGTGACCAGCTCTCCCACTGATTACA |              |

217

218 **Supplementary Table 4.** qPCR primer sequences

| Target      | Forward sequence (5' -> 3')        | Reverse sequence (5' -> 3')        |
|-------------|------------------------------------|------------------------------------|
| Acta2       | AGTGTGATATTGACATCAGGAAG<br>GA      | ACAGAGTACTTGCGTTCTGGA<br>G         |
| Cnn1        | TGTCTGTGTCATCTGCACCTC              | CACTCTCTCAGCTCCTGCTC               |
| SM1+2       | AGCCAAGCTCAAGTCCACTG               | ATCTTGCGCTCATCCTCCAC               |
| SM2         | TGGAAGAGGCAGAGGAGGAG               | TCTCCTGGTGGCTCACTG                 |
| Eln         | ATTCCCAGGTGGAGGAGTTG               | ACTTTCTCTTCCGGCCACAG               |
| Gapdh       | TGTGTCCGTCGTGGATCTGA               | TTGCTGTTGAAGTCGCAGGAG              |
| Sox2        | GCACATGAACGGCTGGAGCAACG            | TGCTGCGAGTAGGACATGCTG<br>TAGG      |
| Itga2       | GGCTATGACTGCAGGTTTGTGGA<br>AGCTCGG | GTTGAGTTCTGTGGTCTCATC<br>CATCTCATC |
| 18s<br>rRNA | GTAACCCGTTGAACCCATT                | CCATCCAATCGGTAGTAGCG               |

219

220 **Supplementary Figure Legends**

221 **Supplementary Figure 1. Low fertility in *Myh11*<sup>ΔK/ΔK</sup> female mice.** (A) The number of  
222 pups at wean derived from the breeding pairs with *Myh11*<sup>ΔK/+</sup> males (WT mothers, n = 27;  
223 *Myh11*<sup>ΔK/+</sup> mothers, n = 27, *Myh11*<sup>ΔK/ΔK</sup> mothers, n = 17). Pups from *Myh11*<sup>ΔK/ΔK</sup> mothers  
224 frequently died during the neonatal period (pups from WT mothers, 6.8 ± 0.28; pups from  
225 *Myh11*<sup>ΔK/+</sup> mothers, 5.4 ± 0.34; pups from *Myh11*<sup>ΔK/ΔK</sup> mothers, 1.5 ± 0.51). \*\* *P* < 0.01,  
226 one-way ANOVA. (B) Dead *Myh11*<sup>ΔK/ΔK</sup> mothers during delivery. (C) Body weights of 4-,  
227 8-, 12- and 32-week-old male and female mice did not differ among genotypes (n = 20).  
228

229 **Supplementary Figure 2. *Myh11* K1256del descending aorta shows thickened media  
230 and adventitia.** (A) Whole images of cross-sectional aortas (ascending, descending and  
231 abdominal) from 12-week-old WT, *Myh11*<sup>ΔK/+</sup> and *Myh11*<sup>ΔK/ΔK</sup> mice. Cross-sections were  
232 stained with haematoxylin and eosin (HE), Elastica van Gieson (EVG, for elastin), Masson  
233 trichome [MT, for collagen; scale bars = 500 μm (×40), 200 μm (×100)]. Aortas with the  
234 pathogenic variant showed increased thickness of media and adventitia. (B) Morphometric  
235 parameters of WT, *Myh11*<sup>ΔK/+</sup> and *Myh11*<sup>ΔK/ΔK</sup> descending thoracic aortas. \*\* *p* < 0.01,  
236 One-way ANOVA with Tukey post-hoc test.  
237

238 **Supplementary Figure 3. Enlarged bladder and hypoplastic uterus observed in  
239 *Myh11*<sup>ΔK/ΔK</sup> mice.** (A) Enlarged bladder, swollen kidneys and hypoplastic uterus were  
240 observed in *Myh11*<sup>ΔK/ΔK</sup> mice at 12 weeks of age (scale bars = 1 cm). (B) *Myh11*<sup>ΔK/ΔK</sup>  
241 bladders showed non-uniform staining such as punch-out and gaps between smooth muscle

242 layers. **(C)** Smooth muscle layers in *Myh11*<sup>ΔK/ΔK</sup> uteruses were thinner than those in WT.  
243 Cross-sections were stained with haematoxylin and eosin (HE) and Masson trichome [MT,  
244 scale bars = 500 μm (×40), 200 μm (×100), 50 μm (×400)]. **(D)** Comparison of the  
245 thickness of the smooth muscle layer (myometrium) from the WT and *Myh11*<sup>ΔK/ΔK</sup> uteri (n  
246 = 4). The data are expressed as the mean ± SEM. \* p < 0.05, Welch's T test.

247

248 **Supplementary Figure 4. Procedures of morphometric measurements in the large-**  
249 **scale electron microscopic images.** **(A)** 15 longitudinally sectioned SMCs (> 30 μm of  
250 cellular diameter and > 5 μm of nuclear diameter) were randomly selected from each aortic  
251 sample (WT and *Myh11*<sup>ΔK/ΔK</sup>, n = 3). Next, the length of adhesive surfaces between the  
252 target cell and other adjacent cells was measured, and the sum of each adhesive length was  
253 considered to indicate the strength of cell adhesion of single SMC. **(B)** 15 50-μm sections  
254 from a whole aortic ring section (WT and *Myh11*<sup>ΔK/ΔK</sup>, n = 3) were randomly selected. The  
255 area of plain texture in the sections is marked as elastic lamellae, and the ratio to the elastic  
256 area was calculated. The ratio of elastic area indicated the amount of elastic fibres in the  
257 aortic sections.

258

259 **Supplementary Figure 5. Ang II enhanced medial degeneration in *Myh11*<sup>ΔK/+</sup> aorta,**  
260 **resulting in aortic dissections.** **(A)** Ang II-treated groups of WT and *Myh11*<sup>ΔK/+</sup> mice  
261 showed increased systolic blood pressure as Ang II induced hypertension, but there was no  
262 significant difference between WT and *Myh11*<sup>ΔK/+</sup> mice [before Ang II-treatment (day 0):  
263 WT, 106.2 ± 3.0 versus *Myh11*<sup>ΔK/+</sup>, 101.5 ± 2.75 mmHg, p = 0.97; after Ang II-treatment

264 (day 14): WT,  $153.5 \pm 3.2$  versus *Myh11*<sup>ΔK/+</sup>,  $150.6 \pm 3.4$  mmHg,  $p = 0.96$ ]. **(B)** Small  
265 intramural hematoma was frequently induced in Ang II-treated *Myh11*<sup>ΔK/+</sup> aorta. **(C)** Aortic  
266 dissections were induced not only in abdominal aortas but also in thoracic aortas of Ang II-  
267 treated *Myh11*<sup>ΔK/+</sup> aorta. **(D)** Survival curves of the WT, *Myh11*<sup>ΔK/+</sup> and *Myh11*<sup>ΔK/ΔK</sup> mice  
268 infused with angiotensin II (Ang II) for 14 days. WT vs *Myh11*<sup>ΔK/+</sup>:  $p = 0.0528$ ; WT vs  
269 *Myh11*<sup>ΔK/ΔK</sup>:  $p < 0.0001$ , Log-rank test. **(E)** Scatter dot plot showing the means  $\pm$  SD of  
270 Ang II type 1 receptor expression normalised with GAPDH expression at baseline ( $n = 5$ ).  
271 The Mann-Whitney U test showed that the difference was not statistically significant.

272

273 **Supplementary Figure 6. Immunoblot analysis of proteins associated with contraction,**

274 **cell adhesion and proliferation.** **(A)** Immunoblot analysis of proteins associated with  
275 contraction and cell adhesion in thoracic aortas of WT and *Myh11*<sup>ΔK/ΔK+</sup> mice at 12 weeks  
276 of age. **(B)** Densitometric analysis of the expression of proliferating cell nuclear antigen  
277 (PCNA) ( $p = 0.8016$ ) and cyclin D1 ( $p = 0.9444$ ) in WT and *Myh11*<sup>ΔK/ΔK</sup> aortas. Protein  
278 expression levels were normalised to that of GAPDH ( $n = 5$ ). The Mann-Whitney U test  
279 showed that the difference was not statistically significant.

280

281 **Supplementary Figure 7. *Myh11*<sup>ΔK/ΔK</sup> iPSCs quickly lose the abilities to self-renew and**

282 **remain undifferentiated.** **(A)** Primary WT and *Myh11*<sup>ΔK/ΔK</sup> mouse embryonic fibroblast  
283 culture 24 h before transduction. **(B)** Alkaline phosphatase (AP) staining of colonies of  
284 from WT *Myh11*<sup>ΔK/ΔK</sup> cells after transduction of Oct4, Sox2, Klf4 and c-Myc (AP, Stem  
285 TAG, Cell Bio Inc.). **(C)** Scatter dot plots showing the average number of AP-positive

286 colonies per culture dish  $\pm$  SEM. ImageJ/Fiji was used to count AP-positive colonies. **(D)**  
287 Phase-contrast images of WT and *Myh11* <sup>$\Delta$ K/ $\Delta$ K</sup> cells outgrowing from embryoid bodies  
288 (EBs). The images were taken 7 days after EBs were plated on the gelatine-coated dishes.  
289 (scale bar = 200 $\mu$ m). *Myh11* <sup>$\Delta$ K/ $\Delta$ K</sup> EBs did not produce any beating cells. Refer to the  
290 supplementary movie to see beating WT cells.

291

292 **Supplementary Figure 8. Stemness of *Myh11* <sup>$\Delta$ K/ $\Delta$ K</sup> is recovered by Nanog transduction**  
293 **along with the Yamanaka factors. (A)** Phase-contrast images of iPSC colonies. The  
294 images were taken at passage (P) 0, P3 and P5 (scale = 80  $\mu$ m, 800  $\mu$ m and 800 $\mu$ m,  
295 respectively). **(B)** Phase-contrast images of WT and *Myh11* <sup>$\Delta$ K/ $\Delta$ K</sup> iPSCs on gelatine-coated  
296 dishes at the 16th to 19th passage (scale bar = 200  $\mu$ m).

297

298 **Supplementary Figure 9. Protein-protein interaction network analysis of genes**  
299 **associated with the integrin or cadherin pathways.** Proteins known to interact or be co-  
300 expressed with each other are connected with a line. A thicker line indicates a higher  
301 confidence of association. The red and blue node colours indicate involvement of the  
302 proteins in adherens junctions and focal adhesions, respectively. The diagram was drawn  
303 with the STRING database.

304

305 **Supplementary Figure 10. Coiled-coil formation of the K1256-containing region of**  
306 ***MYH11*.** **(A)** Amino-acid sequence of the 1226–1288 residues of *Myh11*. K1256 and  
307 hydrophobic residues were coloured in magenta and orange, respectively. The letters under



308 the sequence (abcdefg) indicate the order of heptad repeat. **(B)** Structural models of the  
309 1226–1288 residues of *Myh11* (WT) and its  $\Delta K1256$  pathogenic variants (*MYH11* <sup>$\Delta K/+$</sup>  and  
310 *MYH11* <sup>$\Delta K/\Delta K$</sup> ). Images were generated by MOE program suite (Ver. 2016.08, Chemical  
311 Computing Group Inc., <https://www.chemcomp.com>).<sup>18</sup> Quartet (WT) or triplet ( $\Delta K$ ) lysine  
312 residues are represented as magenta sticks. Orange and green spheres are hydrophobic  
313 residues on two different peptide chains that assemble into a dimeric coiled-coil structure.

314

315 **Supplementary Figure 11. Full western blot images for Supplementary Fig. 6.** Full-  
316 length images corresponding to cropped blots of **(A)** smooth muscle myosin heavy chain  
317 isoform 1 (SM1) (Lanes 2 and 3 = WT. Lanes 6 and 7 = *Myh11* <sup>$\Delta K/\Delta K$</sup> ) and **(B)** smooth  
318 muscle myosin heavy chain isoform 2 (SM2) shown in Supplementary Fig. 6. (Lanes 2 and  
319 3 = WT. Lanes 6 and 7 = *Myh11* <sup>$\Delta K/\Delta K$</sup> ). The red boxes denote the regions used in Fig. 6.

320

321 **Supplementary Figure 12. Full western blot images for Supplementary Fig. 6.** Full-  
322 length images corresponding to cropped blots of **(A)**  $\alpha$ -actin (Lanes 1 and 2 = WT. Lanes 9  
323 and 10 = *Myh11* <sup>$\Delta K/\Delta K$</sup> ) and **(B)** calponin shown in Supplementary Fig. 6. (Lanes 1 and 2 =  
324 WT. Lanes 9 and 10 = *Myh11* <sup>$\Delta K/\Delta K$</sup> ). The red boxes denote the regions used in Fig. 6.

325

326 **Supplementary Figure 13. Full western blot images for Supplementary Fig. 6.** Full-  
327 length images corresponding to cropped blots of **(A)** phosphorylated focal adhesion kinase  
328 (pFAK) (Lanes 1 and 2 = WT. Lanes 5 and 6 = *Myh11* <sup>$\Delta K/\Delta K$</sup> ) and **(B)** focal adhesion kinase  
329 (FAK) shown in Supplementary Fig. 6. (Lanes 2 and 3 = WT. Lanes 8 and 9 = *Myh11* <sup>$\Delta K/\Delta K$</sup> ).

330 The red boxes denote the regions used in Fig. 6.

331

332 **Supplementary Figure 14. Full western blot image for Supplementary Fig. 6.** Full-  
333 length image corresponding to cropped blots of glyceraldehyde 3-phosphate dehydrogenase  
334 (GAPDH) shown in Supplementary Fig. 6. (Lanes 1 and 2 = WT. Lanes 9 and 10 =  
335 *Myh11*<sup>ΔK/ΔK</sup>). The red boxes denote the regions used in Fig. 6.

336

337 **Supplementary Movie**

338 **Beating cells having differentiated in a WT embryoid body.** The movie shows beating  
339 cells that have differentiated in a WT embryoid body. The hanging drop method was used  
340 to generate EBs.

## 341 **Supplementary References**

- 342 1 Schindelin, J. *et al.* Fiji: an open-source platform for biological-image analysis.  
343 *Nature Methods* **9**, 676-682, doi:10.1038/nmeth.2019 (2012).
- 344 2 Preibisch, S., Saalfeld, S. & Tomancak, P. Globally optimal stitching of tiled 3D  
345 microscopic image acquisitions. *Bioinformatics* **25**, 1463-1465,  
346 doi:10.1093/bioinformatics/btp184 (2009).
- 347 3 Kume, S. *et al.* in *Semantic Technology Lecture Notes in Computer Science* Ch.  
348 Chapter 19, 277-285 (2017).
- 349 4 Lu, H. *et al.* Subcutaneous Angiotensin II Infusion using Osmotic Pumps Induces  
350 Aortic Aneurysms in Mice. *J Vis Exp*, doi:10.3791/53191 (2015).
- 351 5 Hasegawa, A., Daub, C., Carninci, P., Hayashizaki, Y. & Lassmann, T. MOIRAI: a  
352 compact workflow system for CAGE analysis. *BMC Bioinformatics* **15**, 144,  
353 doi:10.1186/1471-2105-15-144 (2014).
- 354 6 Mi, H., Muruganujan, A., Ebert, D., Huang, X. & Thomas, P. D. PANTHER version  
355 14: more genomes, a new PANTHER GO-slim and improvements in enrichment  
356 analysis tools. *Nucleic Acids Res* **47**, D419-D426, doi:10.1093/nar/gky1038 (2019).
- 357 7 Carbon, S. *et al.* AmiGO: online access to ontology and annotation data.  
358 *Bioinformatics* **25**, 288-289, doi:10.1093/bioinformatics/btn615 (2009).
- 359 8 Szklarczyk, D. *et al.* STRING v11: protein-protein association networks with  
360 increased coverage, supporting functional discovery in genome-wide experimental  
361 datasets. *Nucleic Acids Res* **47**, D607-D613, doi:10.1093/nar/gky1131 (2019).
- 362 9 Szklarczyk, D. *et al.* The STRING database in 2017: quality-controlled protein-  
363 protein association networks, made broadly accessible. *Nucleic Acids Res* **45**, D362-  
364 D368, doi:10.1093/nar/gkw937 (2017).
- 365 10 Franceschini, A. *et al.* STRING v9.1: protein-protein interaction networks, with  
366 increased coverage and integration. *Nucleic Acids Res* **41**, D808-815,  
367 doi:10.1093/nar/gks1094 (2013).
- 368 11 Franceschini, A., Lin, J., von Mering, C. & Jensen, L. J. SVD-phy: improved  
369 prediction of protein functional associations through singular value decomposition  
370 of phylogenetic profiles. *Bioinformatics* **32**, 1085-1087,  
371 doi:10.1093/bioinformatics/btv696 (2016).
- 372 12 Jensen, L. J. *et al.* STRING 8--a global view on proteins and their functional  
373 interactions in 630 organisms. *Nucleic Acids Res* **37**, D412-416,

374 doi:10.1093/nar/gkn760 (2009).  
375 13 von Mering, C. *et al.* Genome evolution reveals biochemical networks and  
376 functional modules. *Proc Natl Acad Sci U S A* **100**, 15428-15433,  
377 doi:10.1073/pnas.2136809100 (2003).  
378 14 von Mering, C. *et al.* STRING 7--recent developments in the integration and  
379 prediction of protein interactions. *Nucleic Acids Res* **35**, D358-362,  
380 doi:10.1093/nar/gkl825 (2007).  
381 15 Snel, B., Lehmann, G., Bork, P. & Huynen, M. A. STRING: a web-server to retrieve  
382 and display the repeatedly occurring neighbourhood of a gene. *Nucleic Acids Res*  
383 **28**, 3442-3444, doi:10.1093/nar/28.18.3442 (2000).  
384 16 Szklarczyk, D. *et al.* STRING v10: protein-protein interaction networks, integrated  
385 over the tree of life. *Nucleic Acids Res* **43**, D447-452, doi:10.1093/nar/gku1003  
386 (2015).  
387 17 Takahashi, K. & Yamanaka, S. Induction of pluripotent stem cells from mouse  
388 embryonic and adult fibroblast cultures by defined factors. *Cell* **126**, 663-676,  
389 doi:10.1016/j.cell.2006.07.024 (2006).  
390 18 Chemical Computing Group ULC. Molecular Operating Environment (MOE),  
391 2016.08. 010 Sherbooke St. West, Suite #910, Montreal, QC, Canada, H3A 2R7,  
392 <https://www.chemcomp.com/>.  
393

**A**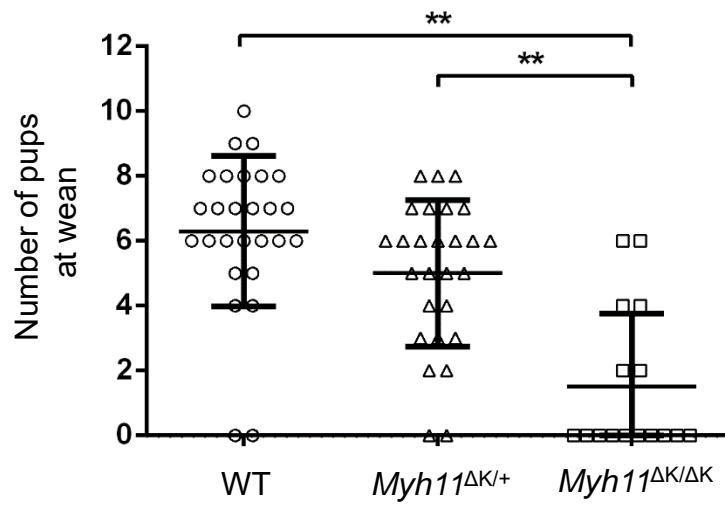**B**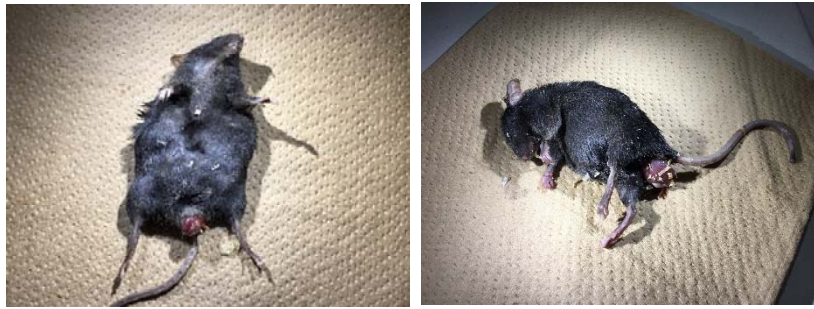**C**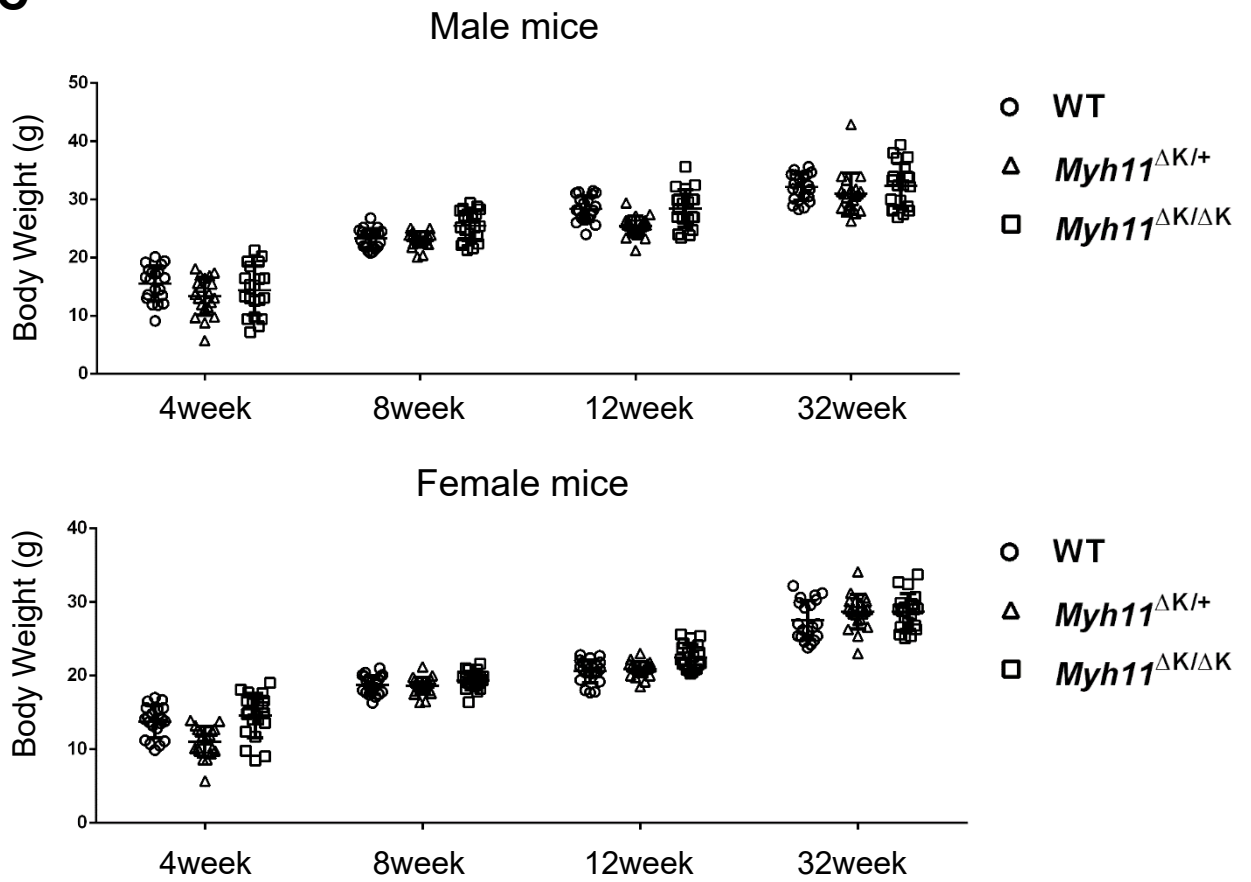

**Supplementary figure 1**

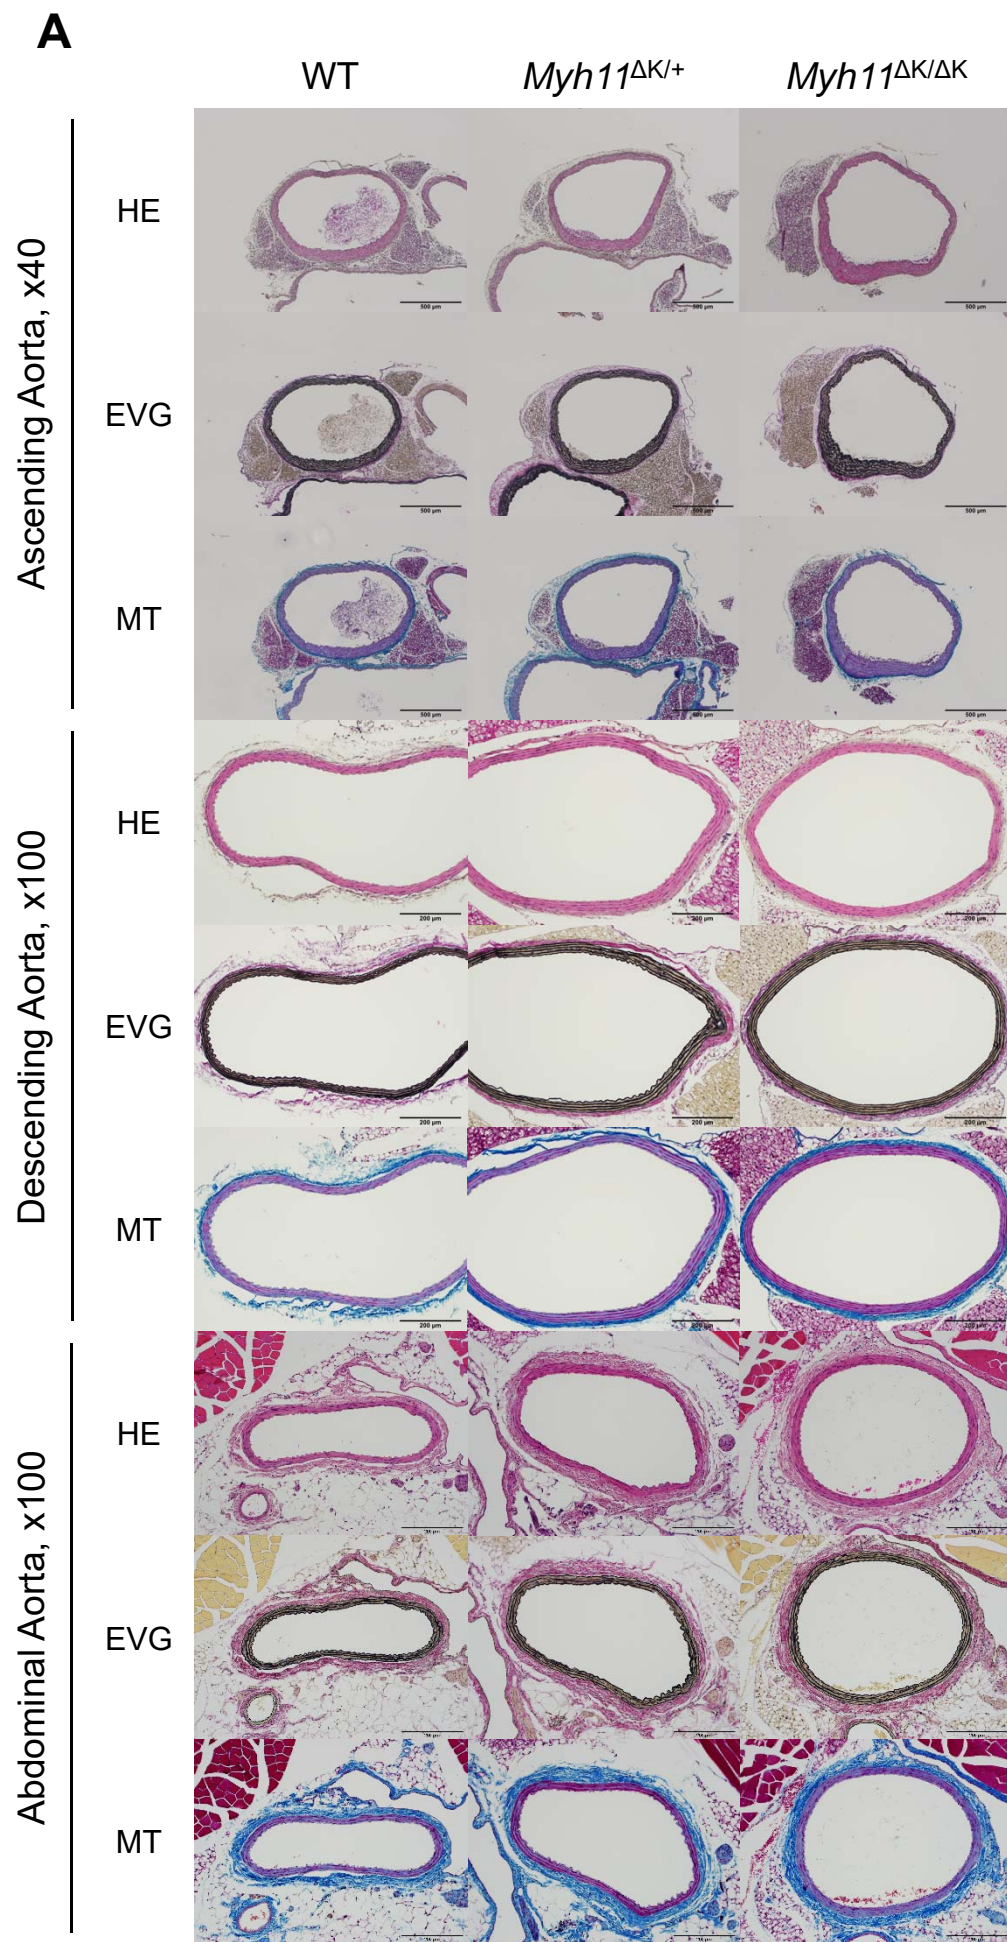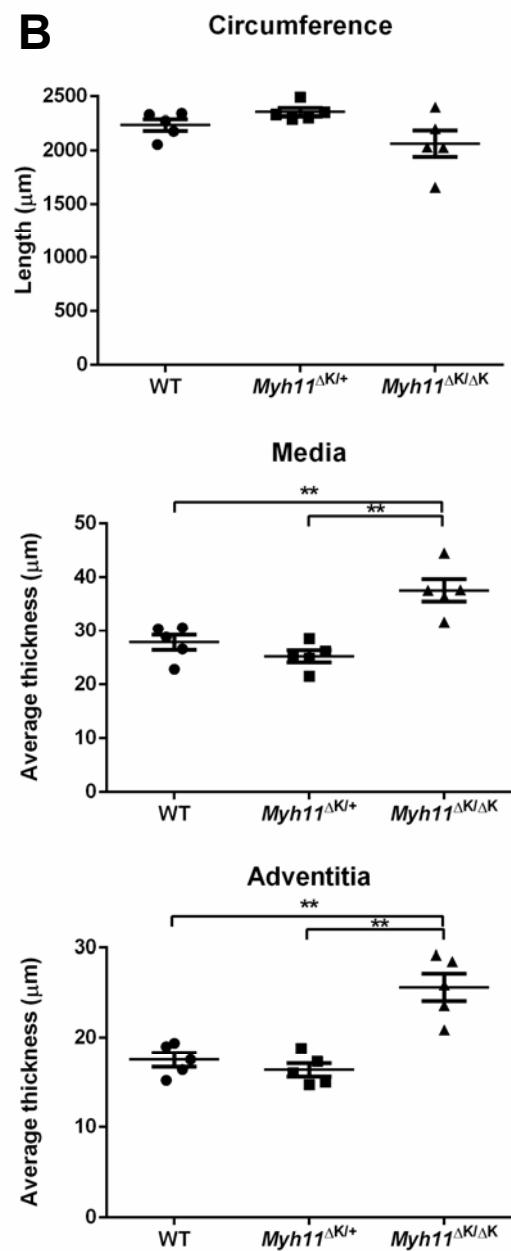

**Supplementary figure 2**

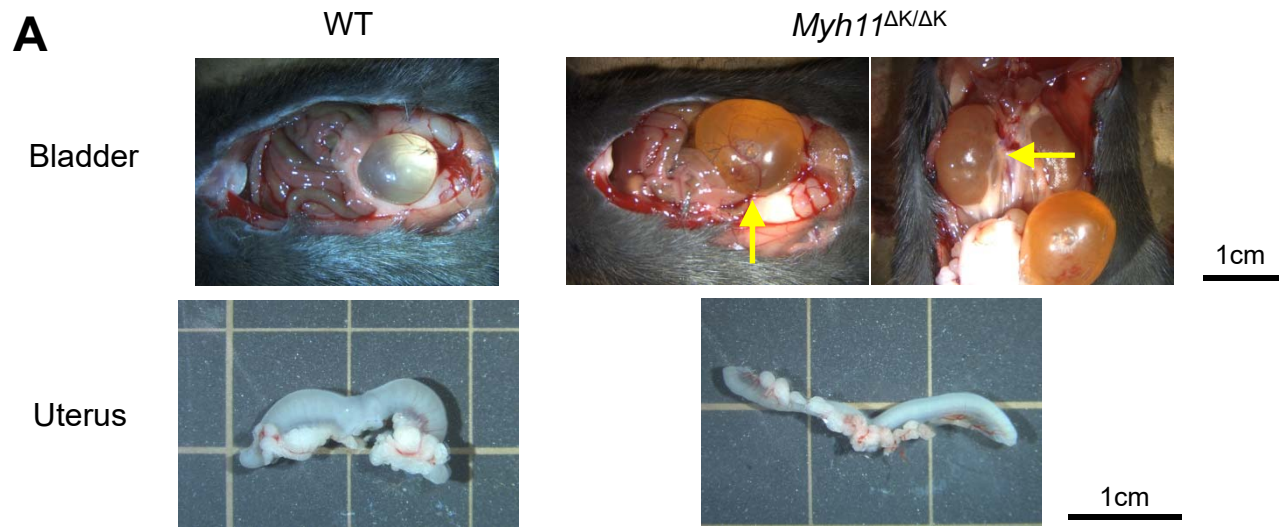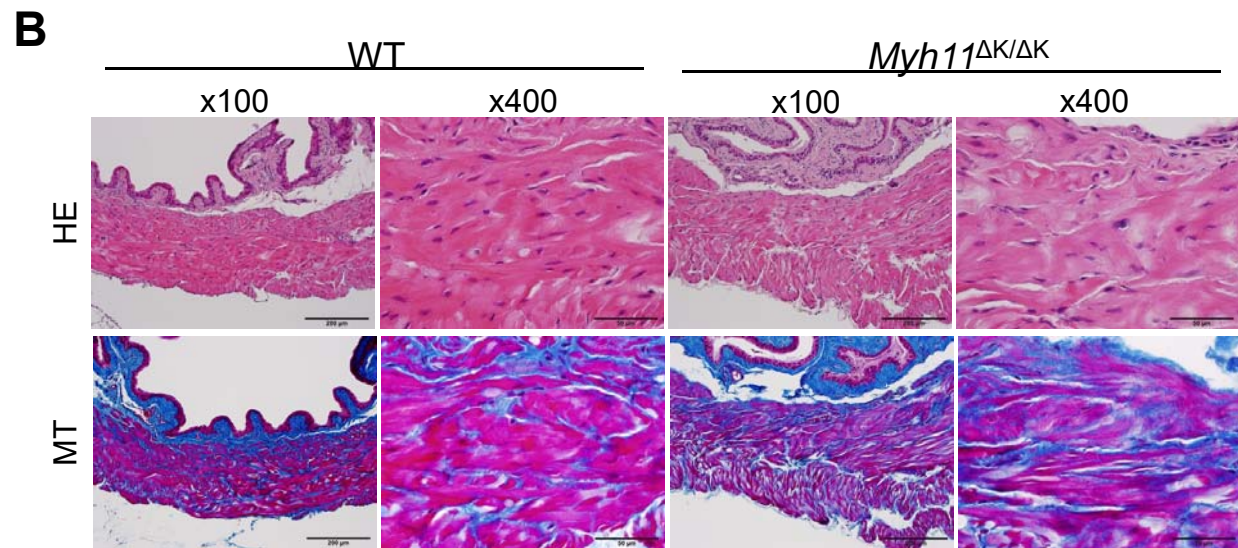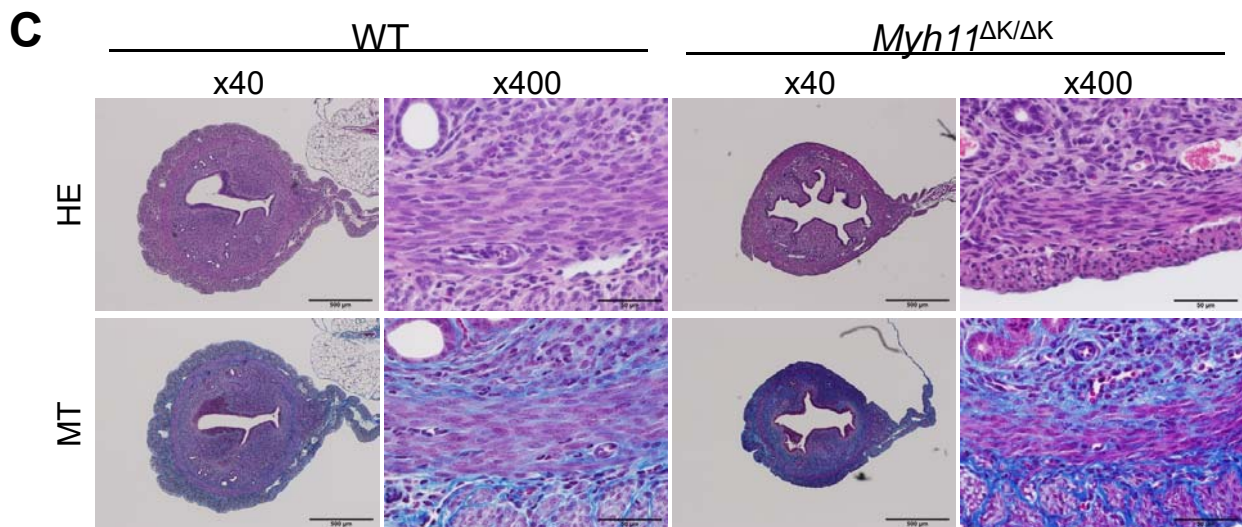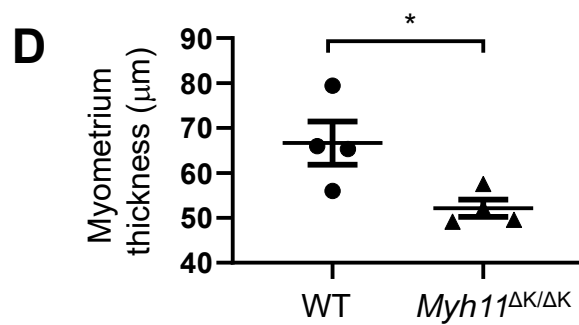

**Supplementary figure 3**

**A**

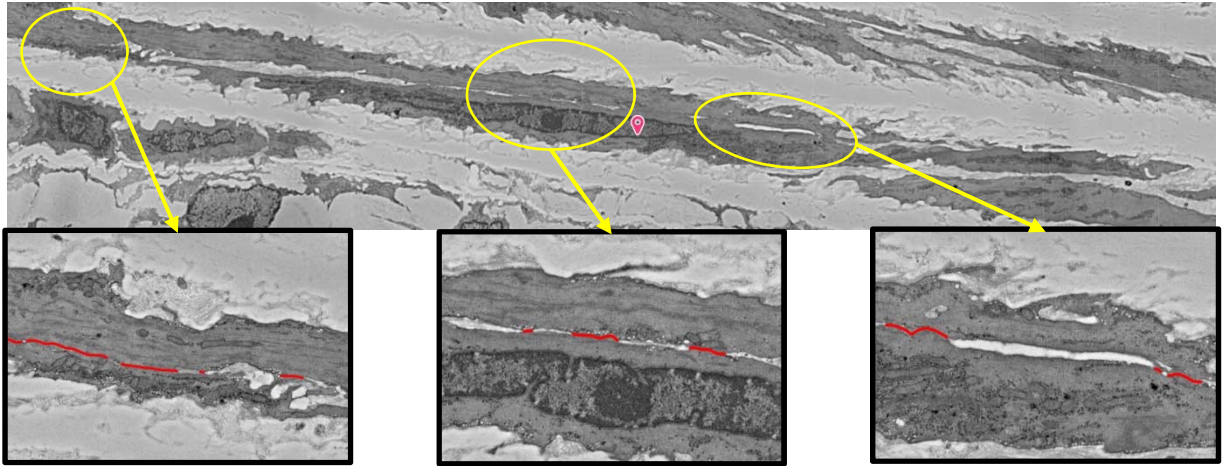

**B**

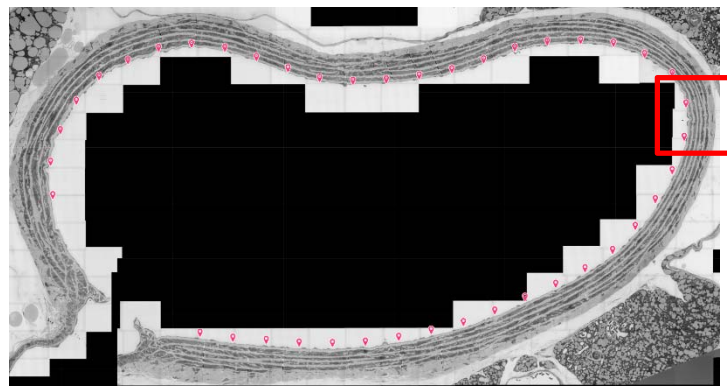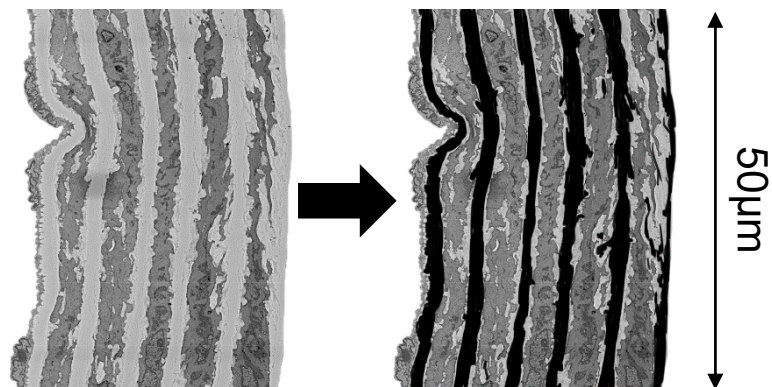

**Supplementary figure 4**



**A**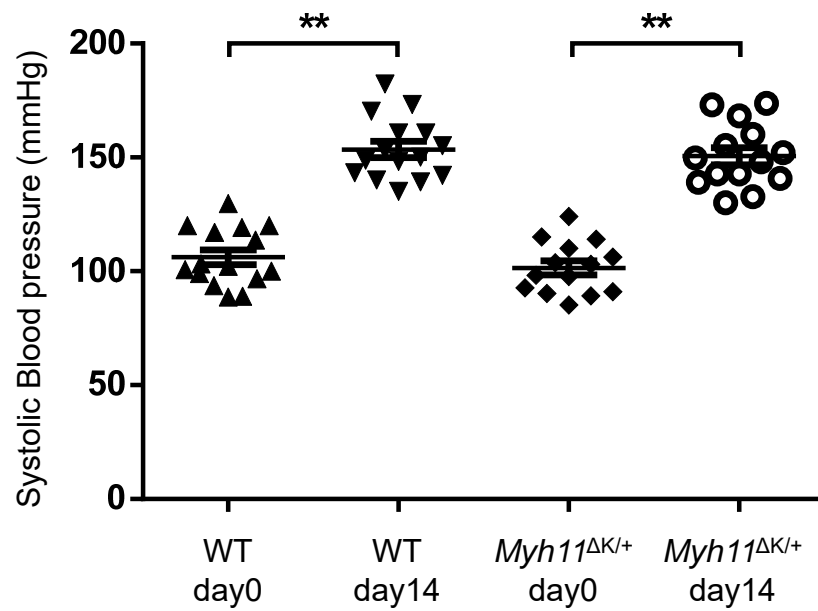**B**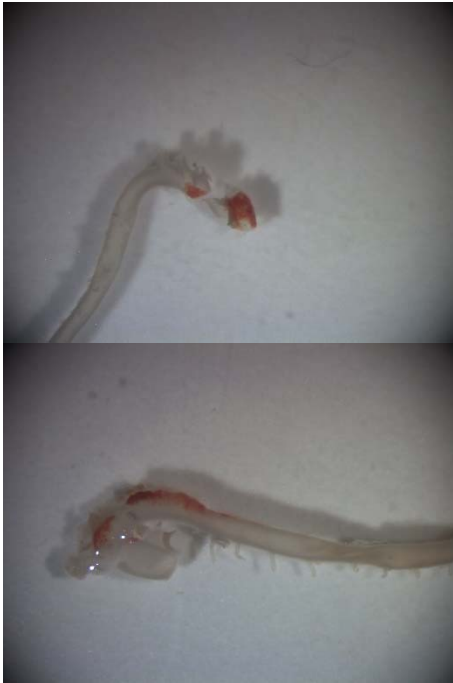**C**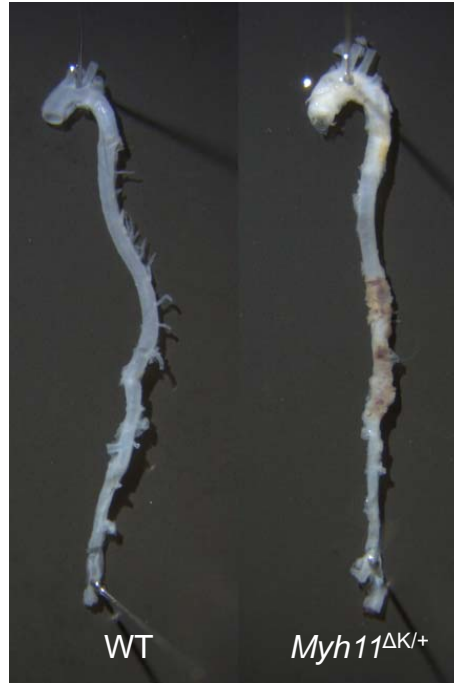**D**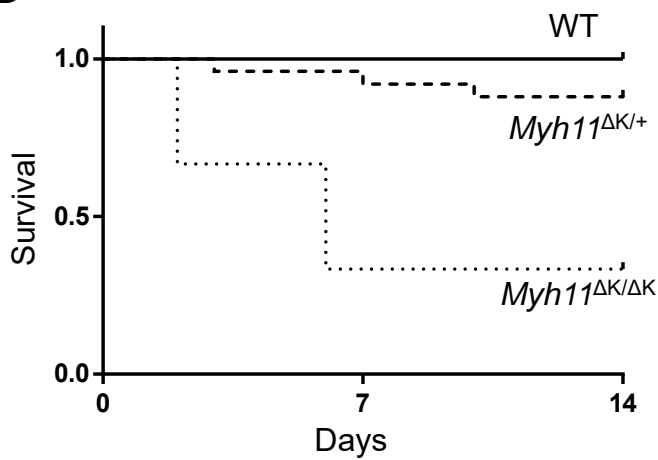**E**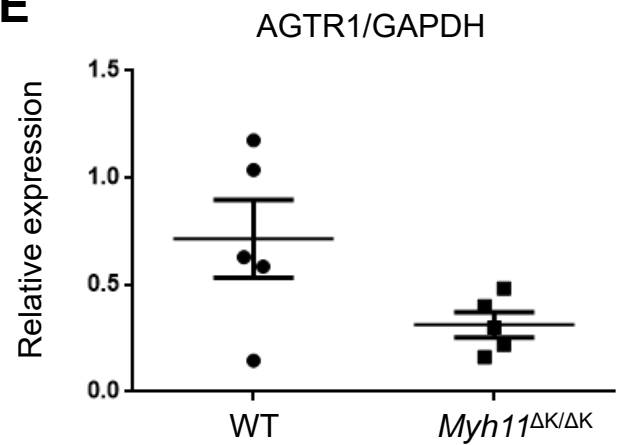**Supplementary figure 5**

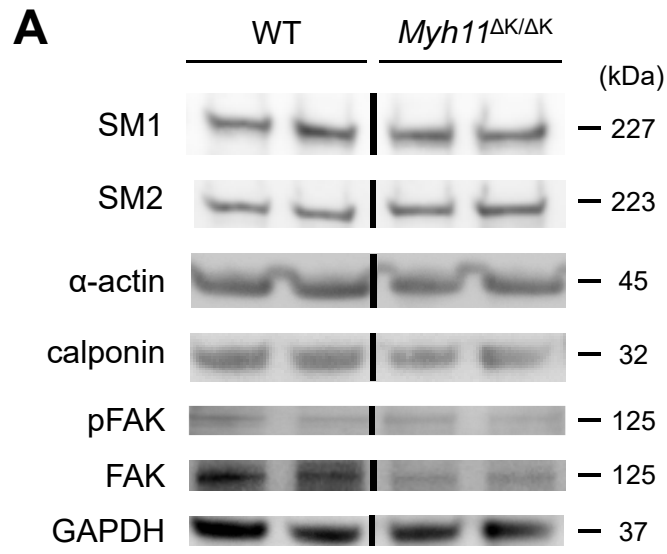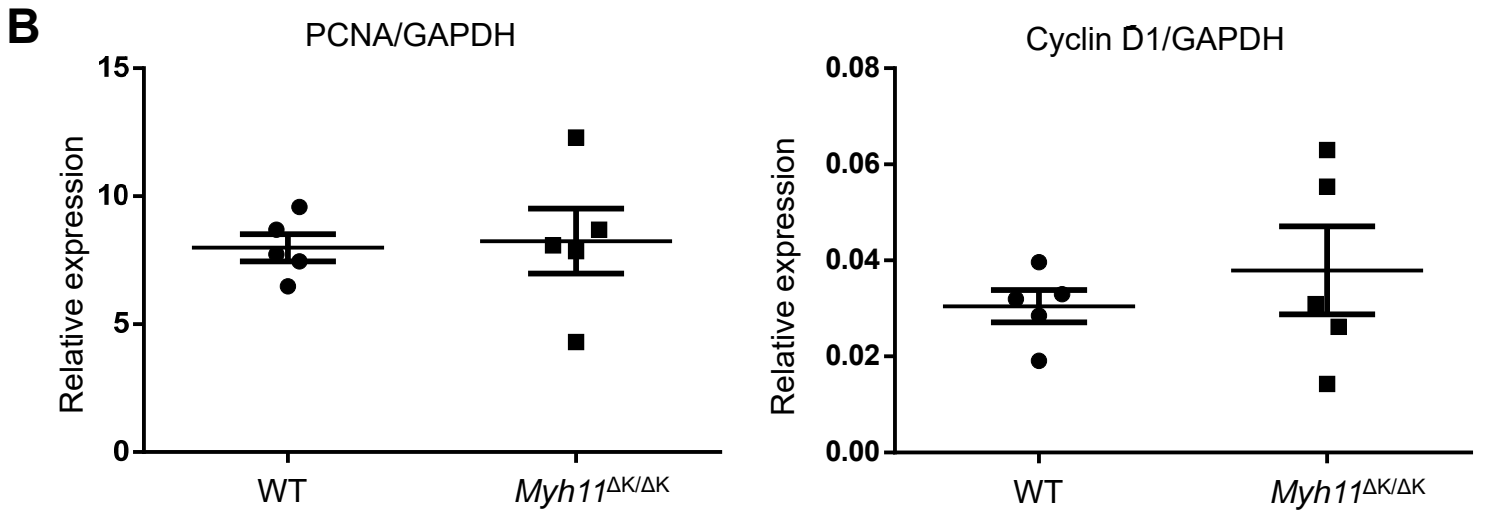

**Supplementary figure 6**

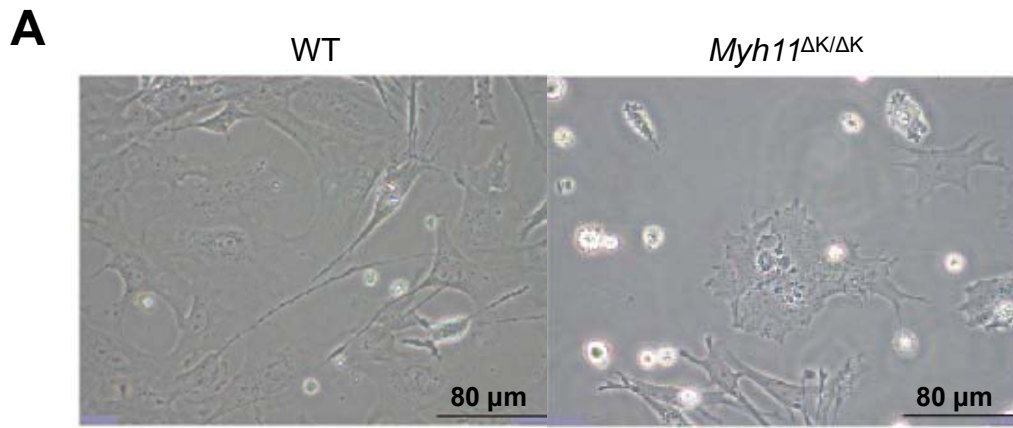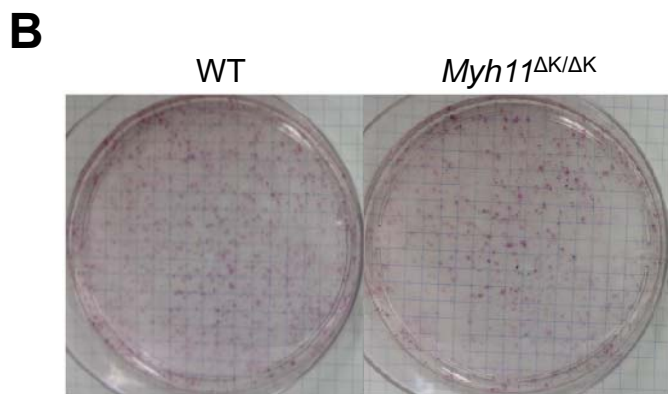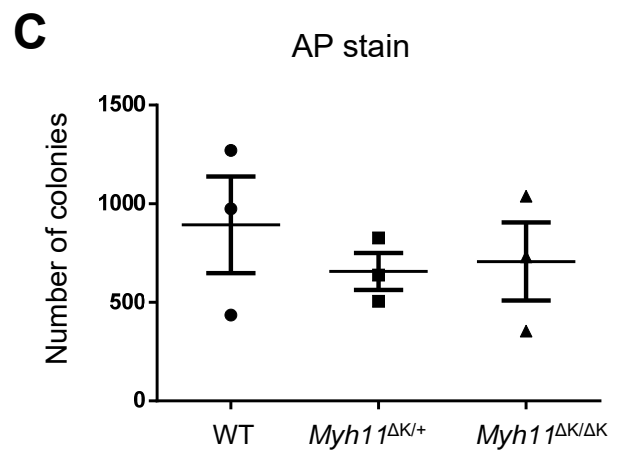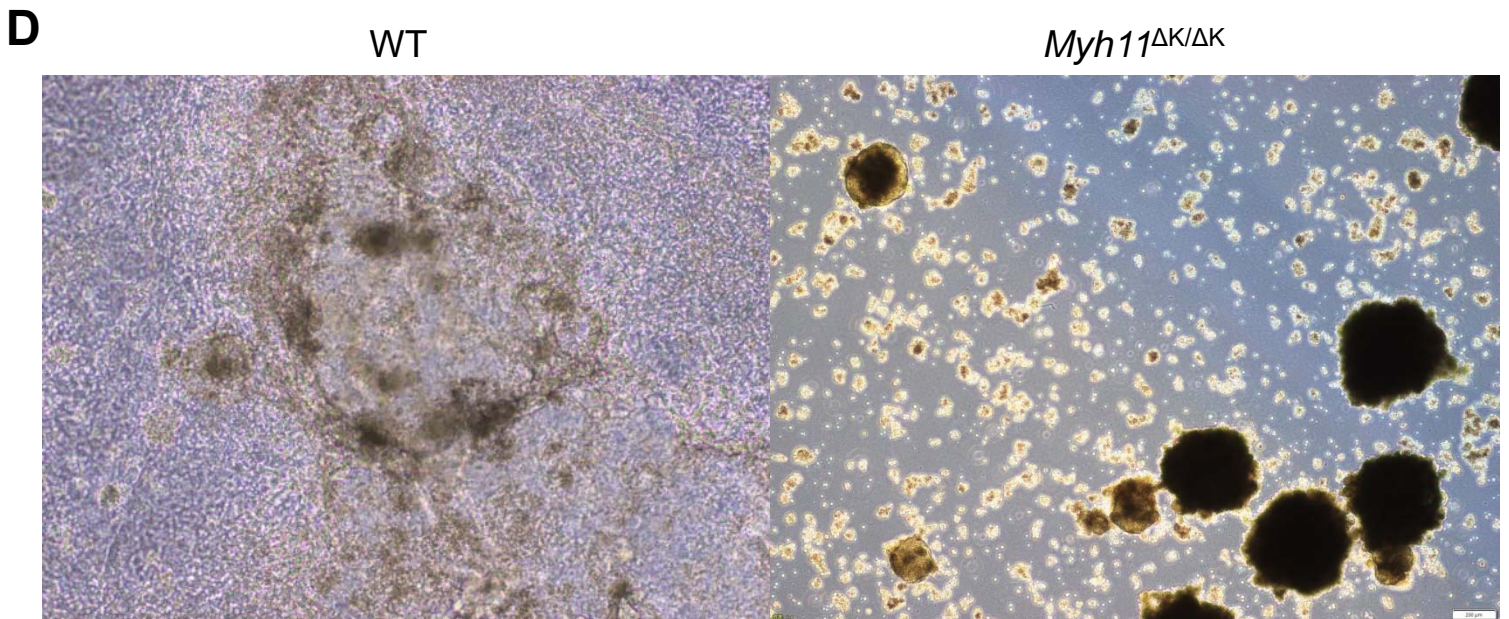

**Supplementary figure 7**

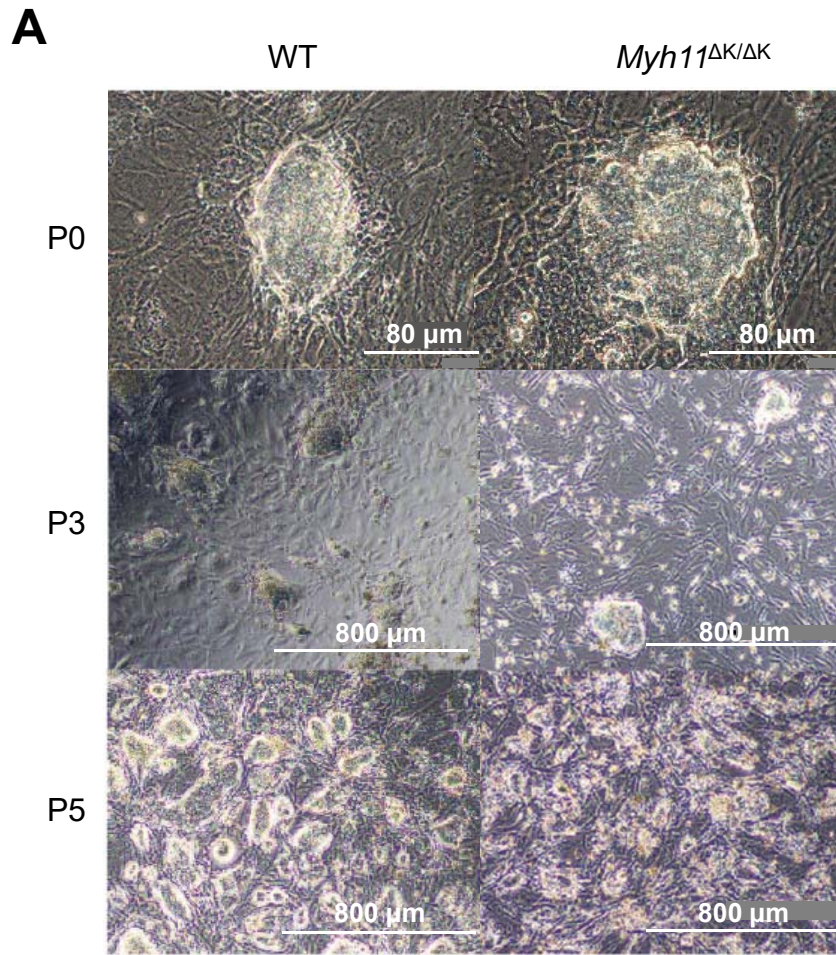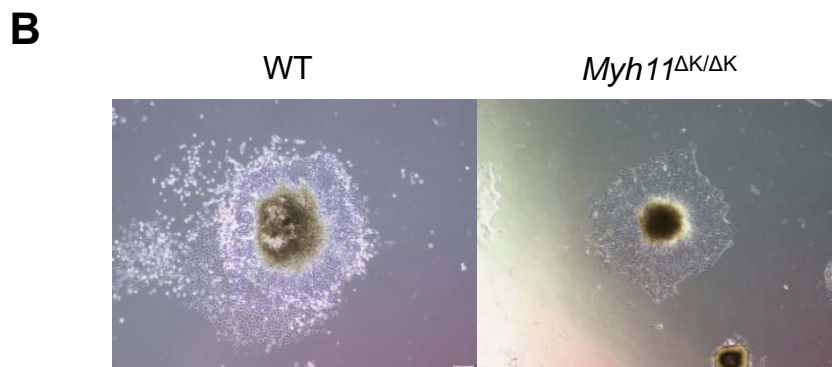

**Supplementary figure 8**

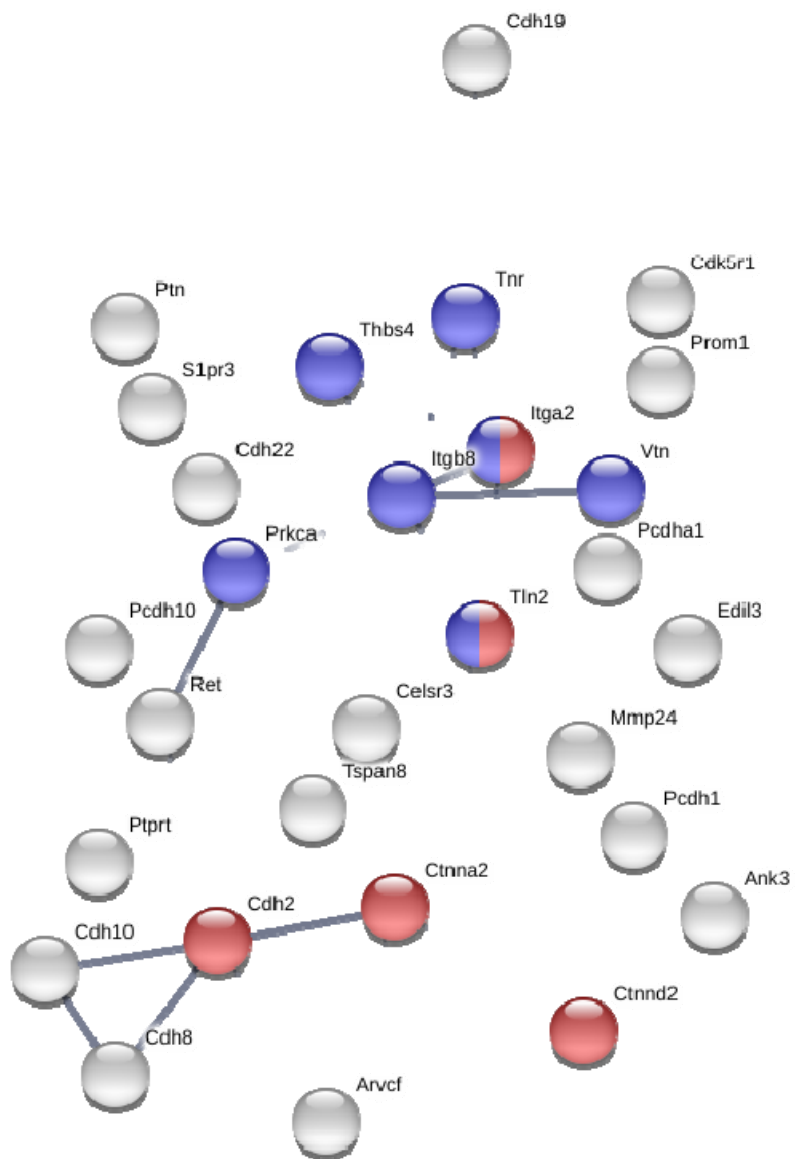

**Supplementary figure 9**

**A**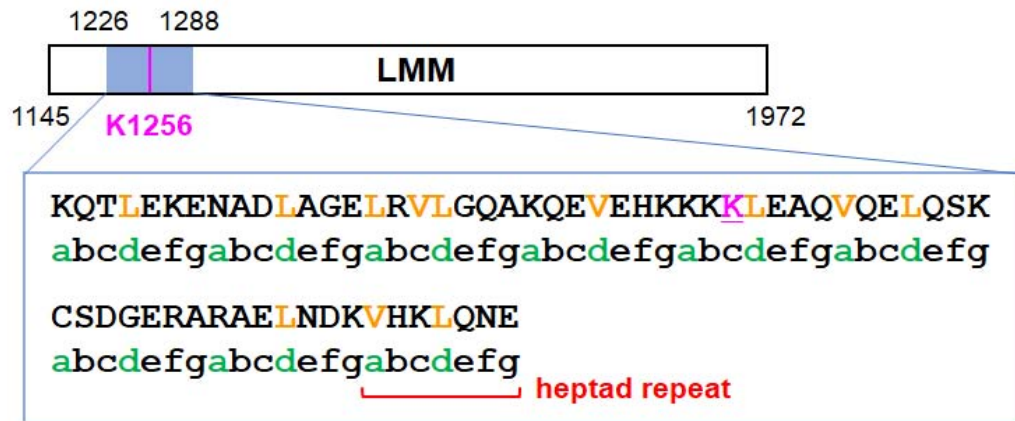**B**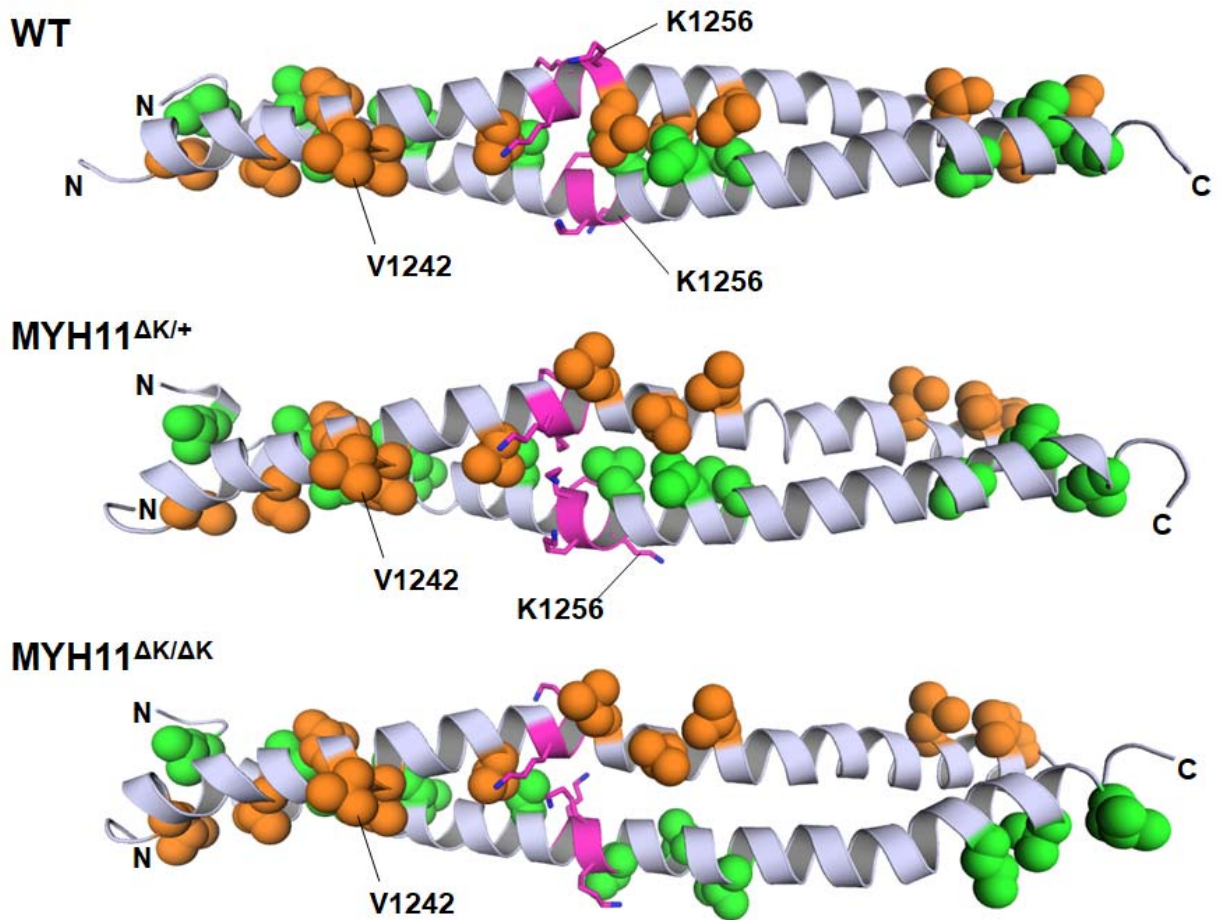**Supplementary figure 10**

**A**

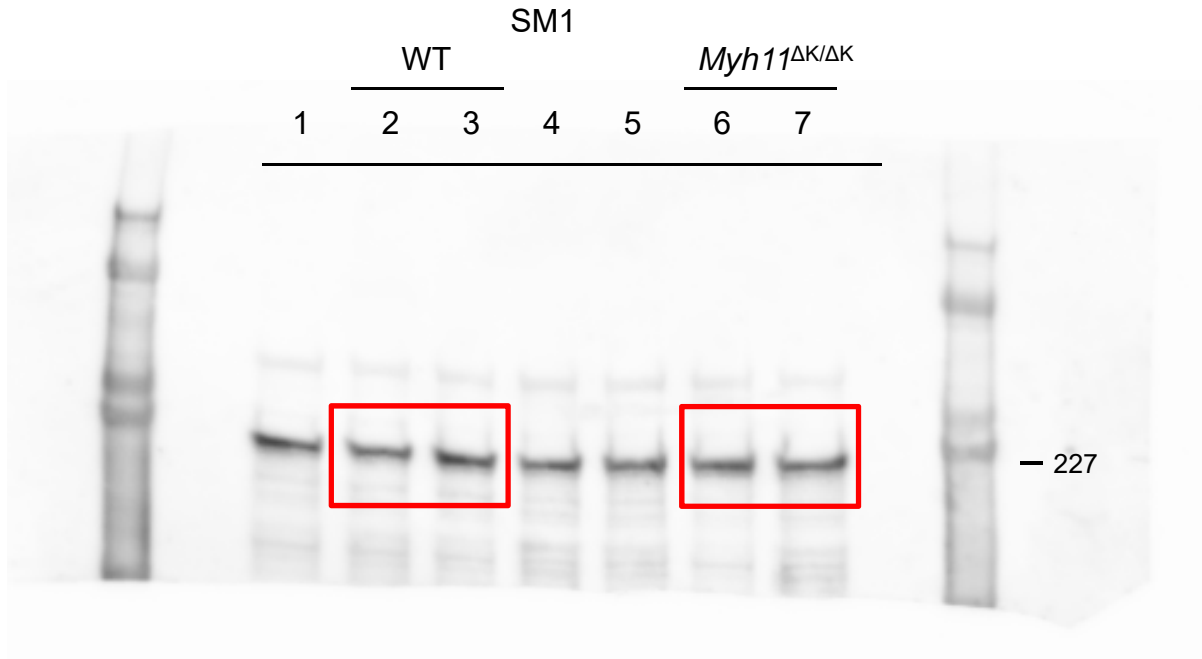

**B**

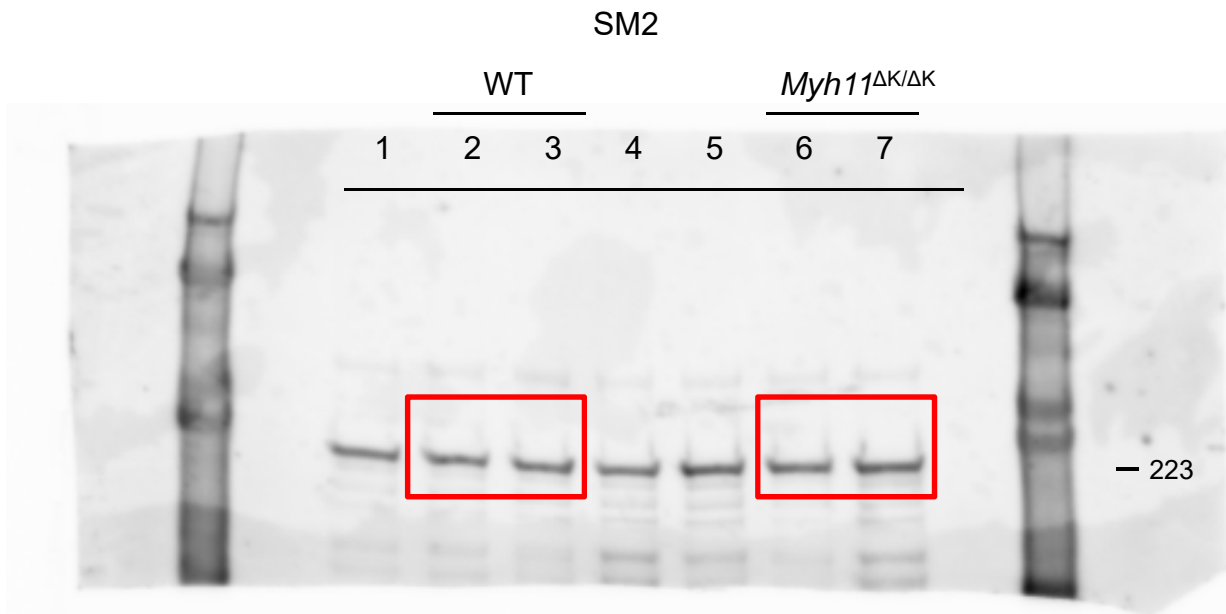

**Supplementary figure 11**

**A**

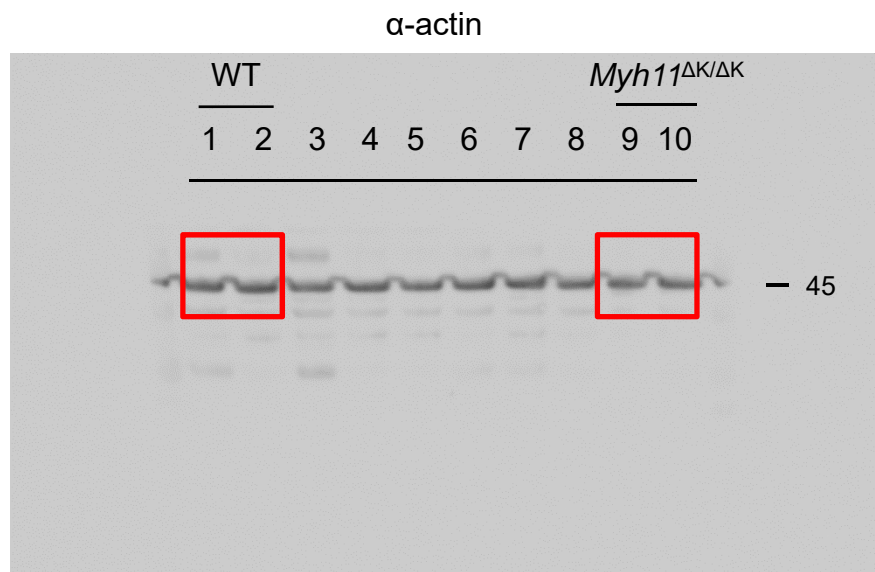

**B**

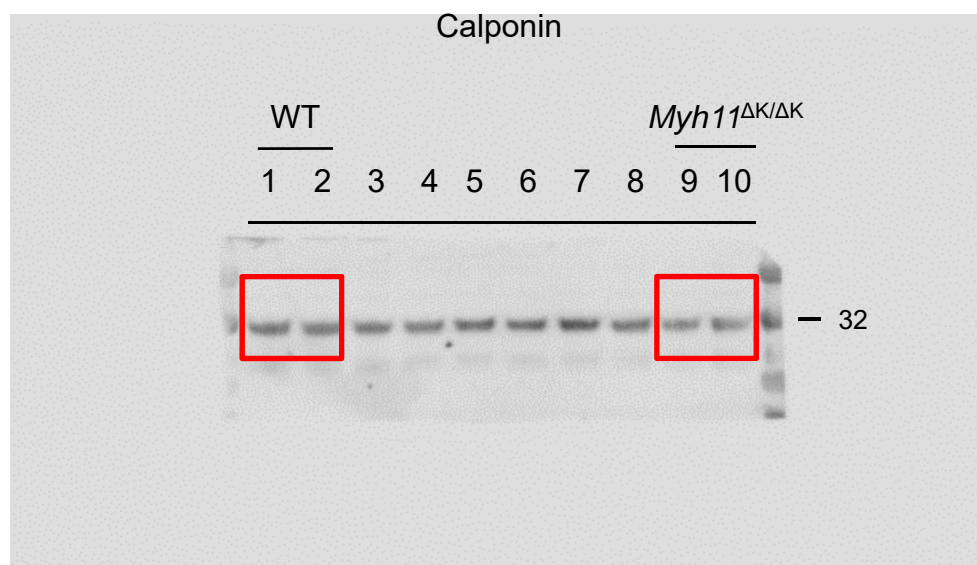



**A**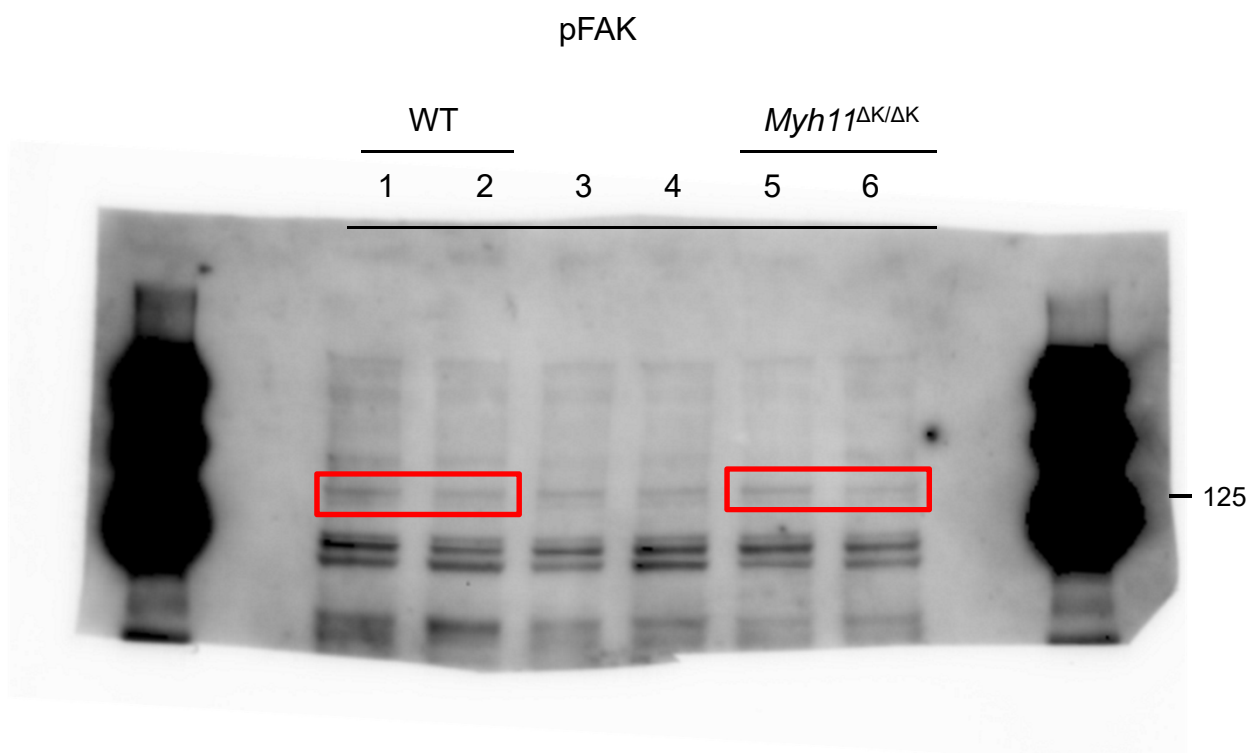**B**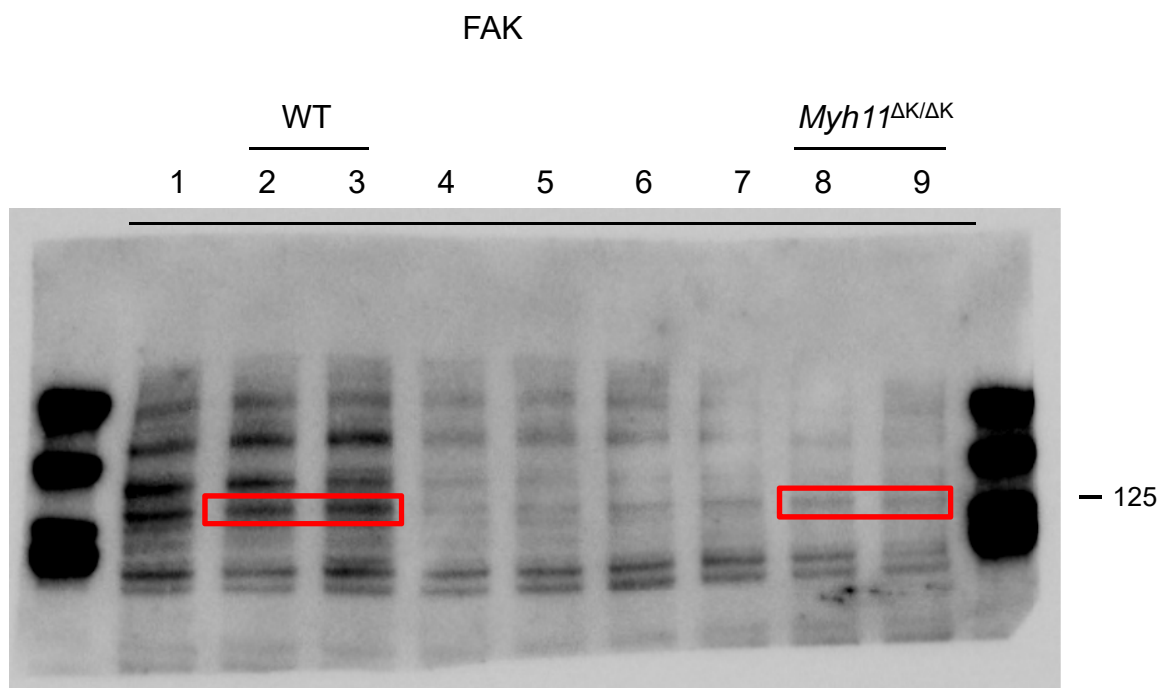**Supplementary figure 13**

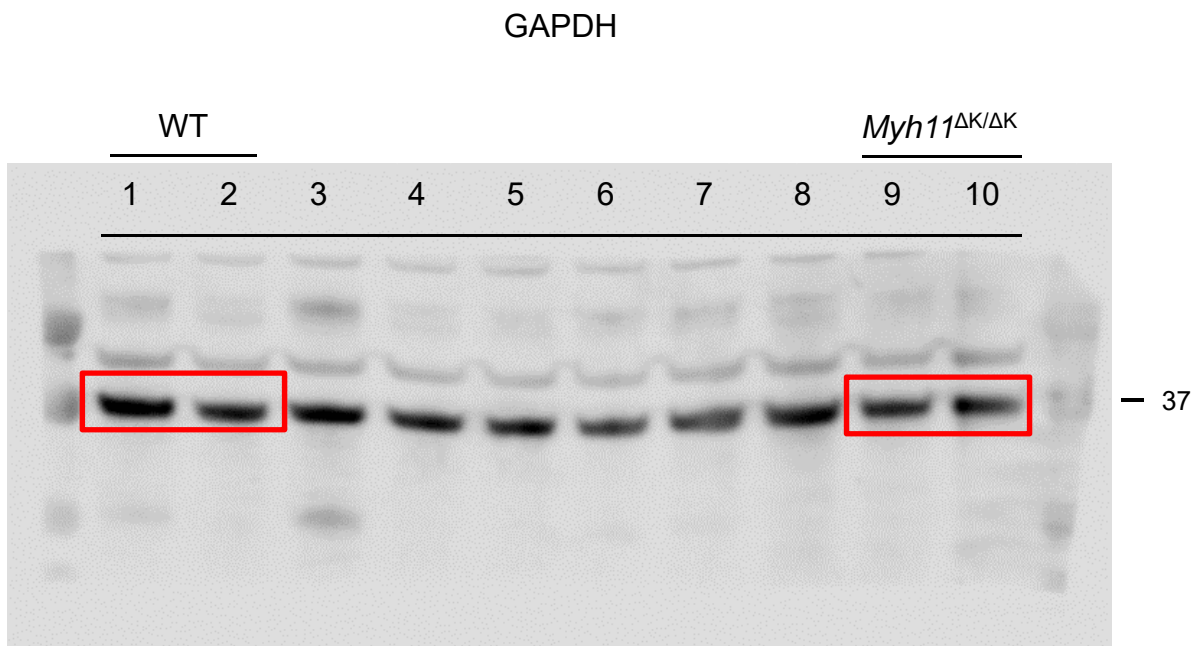

**Supplementary figure 14**
